# Supplementary material
Source: Springer Nature journal article supplement (https://www.springermedizin.de/resource/supplementary/13058_2011_2921_MOESM4_ESM.pdf/9702836)

**A****WT****STAT1<sup>-/-</sup>**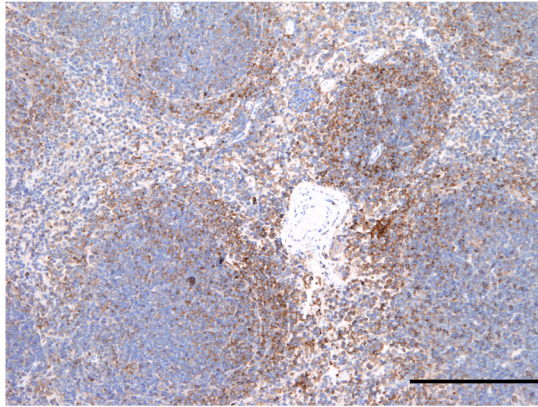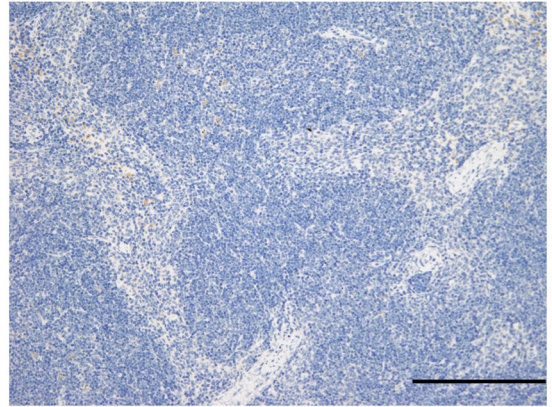**B****low****intermediate****high****ER $\alpha$ -**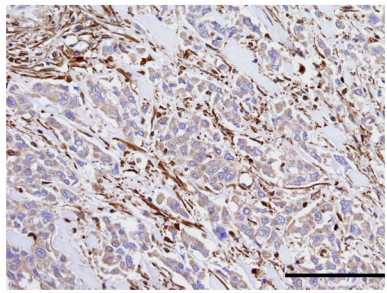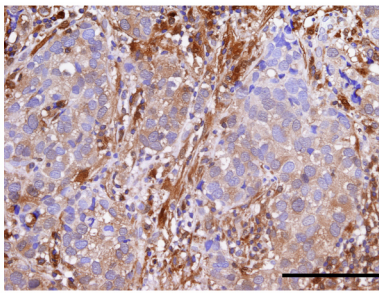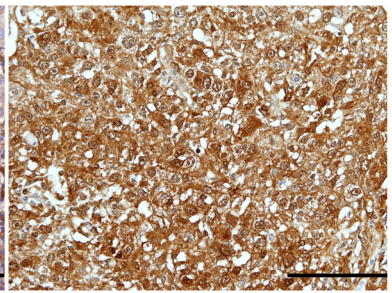**ER $\alpha$ -**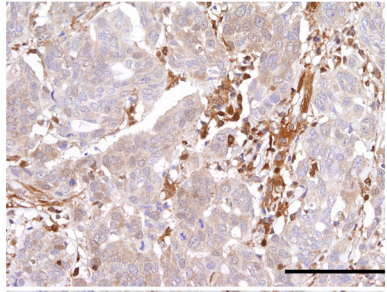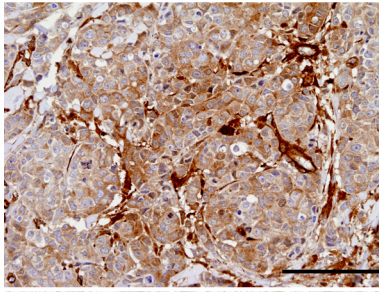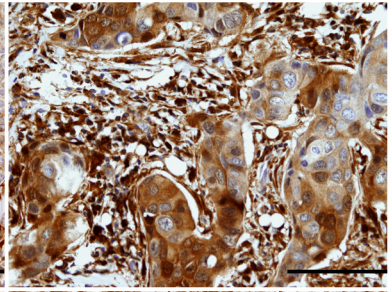**ER $\alpha$ +**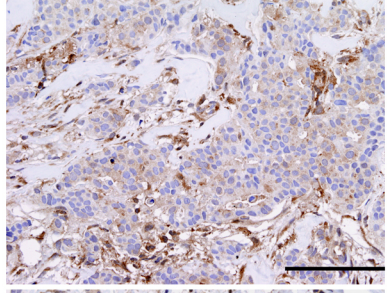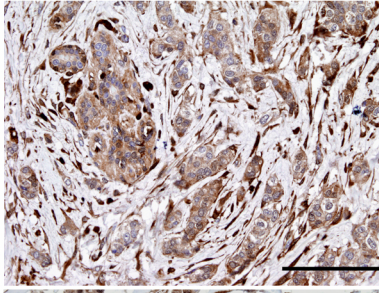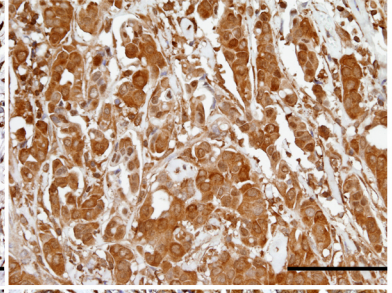**ER $\alpha$ +**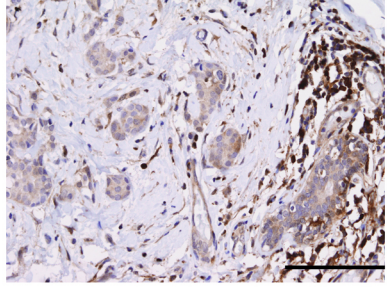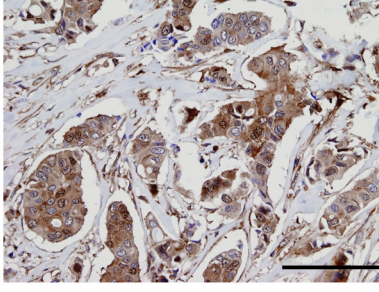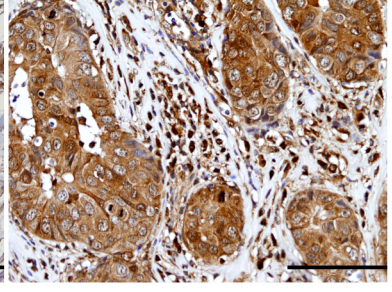

Supplement: MOESM4 [file 9702836]
